# Supplementary material
Source: publisher figshare collection journal article supplement (https://springernature.figshare.com/ndownloader/files/28130880)
Supplement: Supplementary file 1 [file 28130880]

datetime	id	value
1567306800	2	0.014
1567306800	3	0.048
1567306800	5	0.042
1567306800	6	0.003
1567306800	9	0.014
1567307700	2	0.02
1567307700	3	0.049
1567307700	5	0.047
1567307700	6	0.002
1567307700	9	0.024
1567308600	2	0.018
1567308600	3	0.048
1567308600	5	0.032
1567308600	6	0.003
1567308600	9	0.143
1567309500	2	0.008
1567309500	3	0.047
1567309500	5	0.027
1567309500	6	0.002
1567309500	9	0.017
1567310400	2	0.02
1567310400	3	0.048
1567310400	5	0.03
1567310400	6	0.003
1567310400	9	0.019
1567311300	2	0.02
1567311300	3	0.049
1567311300	5	0.05
1567311300	6	0.002
1567311300	9	0.046
1567312200	2	0.008
1567312200	3	0.049
1567312200	5	0.033
1567312200	6	0.003
1567312200	9	0.024
1567313100	2	0.017
1567313100	3	0.048
1567313100	5	0.027
1567313100	6	0.003
1567313100	9	0.002
1567314000	2	0.02
1567314000	3	0.048
1567314000	5	0.035
1567314000	6	0.002
1567314000	9	0.024
1567314900	2	0.013
1567314900	3	0.047
1567314900	5	0.027
1567314900	6	0.003
1567314900	9	0.002
1567315800	2	0.013
1567315800	3	0.048
1567315800	5	0.027
1567315800	6	0.002
1567315800	9	0.045
1567316700	2	0.019
1567316700	3	0.048
1567316700	5	0.041
1567316700	6	0.003
1567316700	9	0.021
1567317600	2	0.017
1567317600	3	0.049
1567317600	5	0.045
1567317600	6	0.002
1567317600	9	0.024
1567318500	2	0.009
1567318500	3	0.048
1567318500	5	0.027
1567318500	6	0.003
1567318500	9	0.002
1567319400	2	0.02
1567319400	3	0.048
1567319400	5	0.027
1567319400	6	0.002
1567319400	9	0.024
1567320300	2	0.019
1567320300	3	0.049
1567320300	5	0.027
1567320300	6	0.003
1567320300	9	0.002
1567321200	2	0.006
1567321200	3	0.048
1567321200	5	0.023
1567321200	6	0.002
1567321200	9	0.056
1567322100	2	0.02
1567322100	3	0.049
1567322100	5	0.021
1567322100	6	0.002
1567322100	9	0.01
1567323000	2	0.023
1567323000	3	0.048
1567323000	5	0.044
1567323000	6	0.003
1567323000	9	0.024
1567323900	2	0.041
1567323900	3	0.048
1567323900	5	0.029
1567323900	6	0.002
1567323900	9	0.002
1567324800	2	0.041
1567324800	3	0.049
1567324800	5	0.022
1567324800	6	0.003
1567324800	9	0.024
1567325700	2	0.027
1567325700	3	0.048
1567325700	5	0.021
1567325700	6	0.002
1567325700	9	0.002
1567326600	2	0.042
1567326600	3	0.047
1567326600	5	0.022
1567326600	6	0.003
1567326600	9	0.063
1567327500	2	0.038
1567327500	3	0.047
1567327500	5	0.028
1567327500	6	0.002
1567327500	9	0.044
1567328400	2	0.013
1567328400	3	0.048
1567328400	5	0.044
1567328400	6	0.003
1567328400	9	0.123
1567329300	2	0.019
1567329300	3	0.047
1567329300	5	0.061
1567329300	6	0.002
1567329300	9	0.002
1567330200	2	0.022
1567330200	3	0.047
1567330200	5	0.043
1567330200	6	0.002
1567330200	9	0.024
1567331100	2	0.016
1567331100	3	0.048
1567331100	5	0.04
1567331100	6	0.003
1567331100	9	0.002
1567332000	2	0.011
1567332000	3	0.031
1567332000	5	0.039
1567332000	6	0.003
1567332000	9	0.064
1567332900	2	0.02
1567332900	3	0.0
1567332900	5	0.038
1567332900	6	0.005
1567332900	9	0.003
1567333800	2	0.02
1567333800	3	0.0
1567333800	5	0.036
1567333800	6	0.007
1567333800	9	0.024
1567334700	2	0.067
1567334700	3	0.0
1567334700	5	0.018
1567334700	6	0.04
1567334700	9	0.002
1567335600	2	0.02
1567335600	3	0.0
1567335600	5	0.049
1567335600	6	0.048
1567335600	9	0.025
1567336500	2	0.03
1567336500	3	0.0
1567336500	5	0.034
1567336500	6	0.044
1567336500	9	0.002
1567337400	2	0.022
1567337400	3	0.0
1567337400	5	0.015
1567337400	6	0.06
1567337400	9	0.06
1567338300	2	0.013
1567338300	3	0.0
1567338300	5	0.014
1567338300	6	0.048
1567338300	9	0.007
1567339200	2	0.02
1567339200	3	0.0
1567339200	5	0.004
1567339200	6	0.036
1567339200	9	0.024
1567340100	2	0.016
1567340100	3	0.0
1567340100	5	0.002
1567340100	6	0.108
1567340100	9	0.001
1567341000	2	0.009
1567341000	3	0.0
1567341000	5	0.007
1567341000	6	0.441
1567341000	9	0.024
1567341900	2	0.02
1567341900	3	0.0
1567341900	5	0.024
1567341900	6	0.009
1567341900	9	0.0
1567342800	2	0.018
1567342800	3	0.0
1567342800	5	0.004
1567342800	6	0.005
1567342800	9	0.049
1567343700	2	0.007
1567343700	3	0.0
1567343700	5	0.001
1567343700	6	0.005
1567343700	9	0.014
1567344600	2	0.019
1567344600	3	0.0
1567344600	5	0.002
1567344600	6	0.005
1567344600	9	0.023
1567345500	2	0.019
1567345500	3	0.0
1567345500	5	0.01
1567345500	6	0.006
1567345500	9	0.0
1567346400	2	0.012
1567346400	3	0.0
1567346400	5	0.039
1567346400	6	0.004
1567346400	9	0.036
1567347300	2	0.046
1567347300	3	0.0
1567347300	5	0.055
1567347300	6	0.013
1567347300	9	0.122
1567348200	2	0.048
1567348200	3	0.0
1567348200	5	0.055
1567348200	6	0.043
1567348200	9	0.044
1567349100	2	0.041
1567349100	3	0.0
1567349100	5	0.036
1567349100	6	0.043
1567349100	9	0.02
1567350000	2	0.04
1567350000	3	0.0
1567350000	5	0.034
1567350000	6	0.039
1567350000	9	0.022
1567350900	2	0.047
1567350900	3	0.0
1567350900	5	0.033
1567350900	6	0.013
1567350900	9	0.001
1567351800	2	0.043
1567351800	3	0.0
1567351800	5	0.034
1567351800	6	0.002
1567351800	9	0.02
1567352700	2	0.062
1567352700	3	0.0
1567352700	5	0.049
1567352700	6	0.002
1567352700	9	0.003
1567353600	2	0.041
1567353600	3	0.0
1567353600	5	0.072
1567353600	6	0.003
1567353600	9	0.051
1567354500	2	0.048
1567354500	3	0.0
1567354500	5	0.051
1567354500	6	0.002
1567354500	9	0.014
1567355400	2	0.045
1567355400	3	0.0
1567355400	5	0.057
1567355400	6	0.002
1567355400	9	0.023
1567356300	2	0.037
1567356300	3	0.0
1567356300	5	0.027
1567356300	6	0.003
1567356300	9	0.0
1567357200	2	0.047
1567357200	3	0.0
1567357200	5	0.022
1567357200	6	0.002
1567357200	9	0.023
1567358100	2	0.049
1567358100	3	0.0
1567358100	5	0.032
1567358100	6	0.003
1567358100	9	0.0
1567359000	2	0.036
1567359000	3	0.0
1567359000	5	0.043
1567359000	6	0.002
1567359000	9	0.064
1567359900	2	0.034
1567359900	3	0.0
1567359900	5	0.025
1567359900	6	0.002
1567359900	9	0.0
1567360800	2	0.032
1567360800	3	0.0
1567360800	5	0.034
1567360800	6	0.003
1567360800	9	0.032
1567361700	2	0.024
1567361700	3	0.0
1567361700	5	0.033
1567361700	6	0.002
1567361700	9	0.034
1567362600	2	0.026
1567362600	3	0.0
1567362600	5	0.033
1567362600	6	0.002
1567362600	9	0.036
1567363500	2	0.032
1567363500	3	0.0
1567363500	5	0.038
1567363500	6	0.004
1567363500	9	0.099
1567364400	2	0.028
1567364400	3	0.0
1567364400	5	0.056
1567364400	6	0.003
1567364400	9	0.137
1567365300	2	0.023
1567365300	3	0.0
1567365300	5	0.039
1567365300	6	0.002
1567365300	9	0.332
1567366200	2	0.032
1567366200	3	0.0
1567366200	5	0.042
1567366200	6	0.002
1567366200	9	0.493
1567367100	2	0.031
1567367100	3	0.0
1567367100	5	0.045
1567367100	6	0.003
1567367100	9	0.183
1567368000	2	0.019
1567368000	3	0.0
1567368000	5	0.049
1567368000	6	0.002
1567368000	9	0.116
1567368900	2	0.032
1567368900	3	0.0
1567368900	5	0.047
1567368900	6	0.003
1567368900	9	0.265
1567369800	2	0.032
1567369800	3	0.0
1567369800	5	0.057
1567369800	6	0.005
1567369800	9	0.025
1567370700	2	0.021
1567370700	3	0.0
1567370700	5	0.056
1567370700	6	0.047
1567370700	9	0.093
1567371600	2	0.027
1567371600	3	0.0
1567371600	5	0.053
1567371600	6	0.056
1567371600	9	0.025
1567372500	2	0.025
1567372500	3	0.0
1567372500	5	0.052
1567372500	6	0.056
1567372500	9	0.035
1567373400	2	0.062
1567373400	3	0.0
1567373400	5	0.052
1567373400	6	0.052
1567373400	9	0.032
1567374300	2	0.065
1567374300	3	0.021
1567374300	5	0.063
1567374300	6	0.052
1567374300	9	0.025
1567375200	2	0.028
1567375200	3	0.049
1567375200	5	0.067
1567375200	6	0.049
1567375200	9	0.002
1567376100	2	0.023
1567376100	3	0.05
1567376100	5	0.047
1567376100	6	0.049
1567376100	9	0.024
1567377000	2	0.025
1567377000	3	0.049
1567377000	5	0.041
1567377000	6	0.046
1567377000	9	0.091
1567377900	2	0.03
1567377900	3	0.049
1567377900	5	0.055
1567377900	6	0.044
1567377900	9	0.078
1567378800	2	0.027
1567378800	3	0.049
1567378800	5	1.103
1567378800	6	0.038
1567378800	9	0.025
1567379700	2	0.02
1567379700	3	0.049
1567379700	5	0.098
1567379700	6	0.037
1567379700	9	0.001
1567380600	2	0.031
1567380600	3	0.049
1567380600	5	0.094
1567380600	6	0.013
1567380600	9	0.025
1567381500	2	0.03
1567381500	3	0.049
1567381500	5	0.083
1567381500	6	0.036
1567381500	9	0.001
1567382400	2	0.017
1567382400	3	0.05
1567382400	5	0.083
1567382400	6	0.051
1567382400	9	0.06
1567383300	2	0.031
1567383300	3	0.049
1567383300	5	0.239
1567383300	6	0.049
1567383300	9	0.011
1567384200	2	0.03
1567384200	3	0.05
1567384200	5	0.377
1567384200	6	0.049
1567384200	9	0.02
1567385100	2	0.019
1567385100	3	0.05
1567385100	5	0.1
1567385100	6	0.048
1567385100	9	0.014
1567386000	2	0.027
1567386000	3	0.05
1567386000	5	0.079
1567386000	6	0.013
1567386000	9	0.013
1567386900	2	0.029
1567386900	3	0.05
1567386900	5	0.049
1567386900	6	0.011
1567386900	9	0.033
1567387800	2	0.021
1567387800	3	0.05
1567387800	5	0.032
1567387800	6	0.039
1567387800	9	0.034
1567388700	2	0.024
1567388700	3	0.05
1567388700	5	0.032
1567388700	6	0.039
1567388700	9	0.025
1567389600	2	0.03
1567389600	3	0.051
1567389600	5	0.035
1567389600	6	0.002
1567389600	9	0.001
1567390500	2	0.024
1567390500	3	0.049
1567390500	5	0.055
1567390500	6	0.003
1567390500	9	0.025
1567391400	2	0.021
1567391400	3	0.051
1567391400	5	0.04
1567391400	6	0.002
1567391400	9	0.001
1567392300	2	0.03
1567392300	3	0.05
1567392300	5	0.028
1567392300	6	0.002
1567392300	9	0.186
1567393200	2	0.025
1567393200	3	0.049
1567393200	5	0.022
1567393200	6	0.003
1567393200	9	0.016
1567394100	2	0.02
1567394100	3	0.049
1567394100	5	0.022
1567394100	6	0.002
1567394100	9	0.024
1567395000	2	0.028
1567395000	3	0.05
1567395000	5	0.021
1567395000	6	0.002
1567395000	9	0.002
1567395900	2	0.018
1567395900	3	0.049
1567395900	5	0.038
1567395900	6	0.003
1567395900	9	0.024
1567396800	2	0.007
1567396800	3	0.049
1567396800	5	0.039
1567396800	6	0.002
1567396800	9	0.002
1567397700	2	0.02
1567397700	3	0.049
1567397700	5	0.022
1567397700	6	0.003
1567397700	9	0.062
1567398600	2	0.019
1567398600	3	0.049
1567398600	5	0.022
1567398600	6	0.002
1567398600	9	0.004
1567399500	2	0.006
1567399500	3	0.048
1567399500	5	0.022
1567399500	6	0.003
1567399500	9	0.025
1567400400	2	0.02
1567400400	3	0.048
1567400400	5	0.022
1567400400	6	0.002
1567400400	9	0.002
1567401300	2	0.019
1567401300	3	0.049
1567401300	5	0.021
1567401300	6	0.003
1567401300	9	0.027
1567402200	2	0.006
1567402200	3	0.049
1567402200	5	0.048
1567402200	6	0.002
1567402200	9	0.001
1567403100	2	0.019
1567403100	3	0.049
1567403100	5	0.036
1567403100	6	0.002
1567403100	9	0.066
1567404000	2	0.019
1567404000	3	0.049
1567404000	5	0.021
1567404000	6	0.003
1567404000	9	0.002
1567404900	2	0.006
1567404900	3	0.049
1567404900	5	0.022
1567404900	6	0.002
1567404900	9	0.024
1567405800	2	0.019
1567405800	3	0.048
1567405800	5	0.021
1567405800	6	0.003
1567405800	9	0.002
1567406700	2	0.019
1567406700	3	0.048
1567406700	5	0.022
1567406700	6	0.002
1567406700	9	0.024
1567407600	2	0.007
1567407600	3	0.048
1567407600	5	0.021
1567407600	6	0.003
1567407600	9	0.002
1567408500	2	0.018
1567408500	3	0.048
1567408500	5	0.041
1567408500	6	0.002
1567408500	9	0.058
1567409400	2	0.019
1567409400	3	0.048
1567409400	5	0.034
1567409400	6	0.003
1567409400	9	0.009
1567410300	2	0.007
1567410300	3	0.049
1567410300	5	0.022
1567410300	6	0.003
1567410300	9	0.011
1567411200	2	0.018
1567411200	3	0.049
1567411200	5	0.021
1567411200	6	0.002
1567411200	9	0.161
1567412100	2	0.019
1567412100	3	0.049
1567412100	5	0.022
1567412100	6	0.003
1567412100	9	0.002
1567413000	2	0.007
1567413000	3	0.049
1567413000	5	0.021
1567413000	6	0.002
1567413000	9	0.025
1567413900	2	0.018
1567413900	3	0.049
1567413900	5	0.022
1567413900	6	0.002
1567413900	9	0.035
1567414800	2	0.023
1567414800	3	0.049
1567414800	5	0.035
1567414800	6	0.003
1567414800	9	0.033
1567415700	2	0.04
1567415700	3	0.048
1567415700	5	0.04
1567415700	6	0.002
1567415700	9	0.002
1567416600	2	0.029
1567416600	3	0.048
1567416600	5	0.055
1567416600	6	0.002
1567416600	9	0.025
1567417500	2	0.038
1567417500	3	0.048
1567417500	5	0.046
1567417500	6	0.003
1567417500	9	0.002
1567418400	2	0.04
1567418400	3	0.025
1567418400	5	0.024
1567418400	6	0.002
1567418400	9	0.013
1567419300	2	0.18
1567419300	3	0.0
1567419300	5	0.025
1567419300	6	0.003
1567419300	9	0.034
1567420200	2	0.216
1567420200	3	0.0
1567420200	5	0.021
1567420200	6	0.002
1567420200	9	0.023
1567421100	2	0.204
1567421100	3	0.0
1567421100	5	0.023
1567421100	6	0.016
1567421100	9	0.026
1567422000	2	0.204
1567422000	3	0.0
1567422000	5	0.022
1567422000	6	0.006
1567422000	9	0.001
1567422900	2	0.212
1567422900	3	0.0
1567422900	5	0.001
1567422900	6	0.007
1567422900	9	0.026
1567423800	2	0.209
1567423800	3	0.0
1567423800	5	0.002
1567423800	6	0.006
1567423800	9	0.002
1567424700	2	0.239
1567424700	3	0.0
1567424700	5	0.001
1567424700	6	0.031
1567424700	9	0.012
1567425600	2	0.202
1567425600	3	0.0
1567425600	5	0.002
1567425600	6	0.043
1567425600	9	0.056
1567426500	2	0.2
1567426500	3	0.0
1567426500	5	0.001
1567426500	6	0.056
1567426500	9	0.002
1567427400	2	0.19
1567427400	3	0.0
1567427400	5	0.002
1567427400	6	0.051
1567427400	9	0.026
1567428300	2	0.199
1567428300	3	0.0
1567428300	5	0.024
1567428300	6	0.062
1567428300	9	0.002
1567429200	2	0.139
1567429200	3	0.0
1567429200	5	0.009
1567429200	6	0.013
1567429200	9	0.026
1567430100	2	0.011
1567430100	3	0.0
1567430100	5	0.002
1567430100	6	0.004
1567430100	9	0.001
1567431000	2	0.015
1567431000	3	0.0
1567431000	5	0.011
1567431000	6	0.011
1567431000	9	0.174
1567431900	2	0.018
1567431900	3	0.0
1567431900	5	0.004
1567431900	6	0.048
1567431900	9	0.033
1567432800	2	0.012
1567432800	3	0.0
1567432800	5	0.009
1567432800	6	0.04
1567432800	9	0.002
1567433700	2	0.013
1567433700	3	0.0
1567433700	5	0.006
1567433700	6	0.039
1567433700	9	0.026
1567434600	2	0.019
1567434600	3	0.0
1567434600	5	0.025
1567434600	6	0.018
1567434600	9	0.002
1567435500	2	0.012
1567435500	3	0.0
1567435500	5	0.012
1567435500	6	0.021
1567435500	9	0.025
1567436400	2	0.012
1567436400	3	0.0
1567436400	5	0.002
1567436400	6	0.028
1567436400	9	0.011
1567437300	2	0.019
1567437300	3	0.0
1567437300	5	0.006
1567437300	6	0.003
1567437300	9	0.058
1567438200	2	0.014
1567438200	3	0.0
1567438200	5	0.005
1567438200	6	0.01
1567438200	9	0.001
1567439100	2	0.037
1567439100	3	0.0
1567439100	5	0.015
1567439100	6	0.009
1567439100	9	0.018
1567440000	2	0.045
1567440000	3	0.0
1567440000	5	0.173
1567440000	6	0.01
1567440000	9	0.01
1567440900	2	0.043
1567440900	3	0.0
1567440900	5	0.025
1567440900	6	0.01
1567440900	9	0.007
1567441800	2	0.035
1567441800	3	0.0
1567441800	5	0.016
1567441800	6	0.009
1567441800	9	0.028
1567442700	2	0.045
1567442700	3	0.0
1567442700	5	0.017
1567442700	6	0.01
1567442700	9	0.036
1567443600	2	0.035
1567443600	3	0.0
1567443600	5	0.012
1567443600	6	0.01
1567443600	9	0.026
1567444500	2	0.019
1567444500	3	0.0
1567444500	5	0.012
1567444500	6	0.01
1567444500	9	0.002
1567445400	2	0.03
1567445400	3	0.0
1567445400	5	0.022
1567445400	6	0.01
1567445400	9	0.026
1567446300	2	0.031
1567446300	3	0.0
1567446300	5	0.033
1567446300	6	0.009
1567446300	9	0.001
1567447200	2	0.018
1567447200	3	0.0
1567447200	5	0.016
1567447200	6	0.01
1567447200	9	0.042
1567448100	2	0.031
1567448100	3	0.0
1567448100	5	0.013
1567448100	6	0.01
1567448100	9	0.027
1567449000	2	0.03
1567449000	3	0.0
1567449000	5	0.013
1567449000	6	0.01
1567449000	9	0.025
1567449900	2	0.018
1567449900	3	0.0
1567449900	5	0.012
1567449900	6	0.01
1567449900	9	0.006
1567450800	2	0.017
1567450800	3	0.0
1567450800	5	0.014
1567450800	6	0.01
1567450800	9	0.161
1567451700	2	0.021
1567451700	3	0.0
1567451700	5	0.035
1567451700	6	0.009
1567451700	9	0.007
1567452600	2	0.014
1567452600	3	0.0
1567452600	5	0.023
1567452600	6	0.01
1567452600	9	0.052
1567453500	2	0.015
1567453500	3	0.0
1567453500	5	0.024
1567453500	6	0.01
1567453500	9	0.018
1567454400	2	0.021
1567454400	3	0.0
1567454400	5	0.037
1567454400	6	0.01
1567454400	9	0.018
1567455300	2	0.018
1567455300	3	0.0
1567455300	5	0.035
1567455300	6	0.01
1567455300	9	0.013
1567456200	2	0.049
1567456200	3	0.0
1567456200	5	0.034
1567456200	6	0.01
1567456200	9	0.014
1567457100	2	0.023
1567457100	3	0.0
1567457100	5	0.046
1567457100	6	0.01
1567457100	9	0.046
1567458000	2	0.027
1567458000	3	0.0
1567458000	5	0.054
1567458000	6	0.01
1567458000	9	0.05
1567458900	2	0.063
1567458900	3	0.002
1567458900	5	0.035
1567458900	6	0.01
1567458900	9	0.03
1567459800	2	0.049
1567459800	3	0.027
1567459800	5	1.191
1567459800	6	0.01
1567459800	9	0.002
1567460700	2	0.048
1567460700	3	0.047
1567460700	5	0.036
1567460700	6	0.009
1567460700	9	0.025
1567461600	2	0.036
1567461600	3	0.047
1567461600	5	0.024
1567461600	6	0.034
1567461600	9	0.002
1567462500	2	0.098
1567462500	3	0.048
1567462500	5	0.042
1567462500	6	0.054
1567462500	9	0.063
1567463400	2	0.219
1567463400	3	0.047
1567463400	5	0.064
1567463400	6	0.056
1567463400	9	0.004
1567464300	2	0.254
1567464300	3	0.047
1567464300	5	0.049
1567464300	6	0.064
1567464300	9	0.025
1567465200	2	0.279
1567465200	3	0.048
1567465200	5	0.042
1567465200	6	0.051
1567465200	9	0.005
1567466100	2	0.278
1567466100	3	0.047
1567466100	5	0.042
1567466100	6	0.053
1567466100	9	0.021
1567467000	2	0.214
1567467000	3	0.047
1567467000	5	0.36
1567467000	6	0.022
1567467000	9	0.014
1567467900	2	0.271
1567467900	3	0.045
1567467900	5	0.042
1567467900	6	0.016
1567467900	9	0.053
1567468800	2	0.224
1567468800	3	0.045
1567468800	5	0.05
1567468800	6	0.016
1567468800	9	0.002
1567469700	2	0.164
1567469700	3	0.045
1567469700	5	0.063
1567469700	6	0.016
1567469700	9	0.024
1567470600	2	0.021
1567470600	3	0.046
1567470600	5	0.04
1567470600	6	0.022
1567470600	9	0.002
1567471500	2	0.029
1567471500	3	0.046
1567471500	5	0.03
1567471500	6	0.025
1567471500	9	0.025
1567472400	2	0.027
1567472400	3	0.046
1567472400	5	0.031
1567472400	6	0.013
1567472400	9	0.019
1567473300	2	0.019
1567473300	3	0.046
1567473300	5	0.03
1567473300	6	0.011
1567473300	9	0.048
1567474200	2	0.029
1567474200	3	0.046
1567474200	5	0.031
1567474200	6	0.011
1567474200	9	0.002
1567475100	2	0.028
1567475100	3	0.045
1567475100	5	0.04
1567475100	6	0.011
1567475100	9	0.025
1567476000	2	0.017
1567476000	3	0.046
1567476000	5	0.051
1567476000	6	0.01
1567476000	9	0.002
1567476900	2	0.029
1567476900	3	0.046
1567476900	5	0.031
1567476900	6	0.011
1567476900	9	0.026
1567477800	2	0.03
1567477800	3	0.047
1567477800	5	0.03
1567477800	6	0.012
1567477800	9	0.02
1567478700	2	0.016
1567478700	3	0.046
1567478700	5	0.031
1567478700	6	0.007
1567478700	9	0.049
1567479600	2	0.029
1567479600	3	0.046
1567479600	5	0.03
1567479600	6	0.002
1567479600	9	0.002
1567480500	2	0.02
1567480500	3	0.046
1567480500	5	0.03
1567480500	6	0.002
1567480500	9	0.025
1567481400	2	0.006
1567481400	3	0.046
1567481400	5	0.042
1567481400	6	0.003
1567481400	9	0.002
1567482300	2	0.019
1567482300	3	0.047
1567482300	5	0.051
1567482300	6	0.002
1567482300	9	0.024
1567483200	2	0.019
1567483200	3	0.047
1567483200	5	0.031
1567483200	6	0.002
1567483200	9	0.014
1567484100	2	0.006
1567484100	3	0.046
1567484100	5	0.029
1567484100	6	0.003
1567484100	9	0.047
1567485000	2	0.019
1567485000	3	0.047
1567485000	5	0.027
1567485000	6	0.002
1567485000	9	0.01
1567485900	2	0.019
1567485900	3	0.046
1567485900	5	0.027
1567485900	6	0.003
1567485900	9	0.013
1567486800	2	0.006
1567486800	3	0.046
1567486800	5	0.027
1567486800	6	0.002
1567486800	9	0.014
1567487700	2	0.019
1567487700	3	0.046
1567487700	5	0.041
1567487700	6	0.002
1567487700	9	0.003
1567488600	2	0.019
1567488600	3	0.046
1567488600	5	0.048
1567488600	6	0.003
1567488600	9	0.03
1567489500	2	0.006
1567489500	3	0.046
1567489500	5	0.026
1567489500	6	0.002
1567489500	9	0.037
1567490400	2	0.019
1567490400	3	0.046
1567490400	5	0.027
1567490400	6	0.002
1567490400	9	0.026
1567491300	2	0.019
1567491300	3	0.047
1567491300	5	0.027
1567491300	6	0.003
1567491300	9	0.002
1567492200	2	0.005
1567492200	3	0.046
1567492200	5	0.027
1567492200	6	0.002
1567492200	9	0.025
1567493100	2	0.019
1567493100	3	0.047
1567493100	5	0.027
1567493100	6	0.002
1567493100	9	0.002
1567494000	2	0.019
1567494000	3	0.048
1567494000	5	0.033
1567494000	6	0.003
1567494000	9	0.024
1567494900	2	0.006
1567494900	3	0.048
1567494900	5	0.049
1567494900	6	0.002
1567494900	9	0.044
1567495800	2	0.019
1567495800	3	0.047
1567495800	5	0.03
1567495800	6	0.002
1567495800	9	0.011
1567496700	2	0.018
1567496700	3	0.048
1567496700	5	0.026
1567496700	6	0.003
1567496700	9	0.017
1567497600	2	0.007
1567497600	3	0.047
1567497600	5	0.027
1567497600	6	0.002
1567497600	9	0.001
1567498500	2	0.018
1567498500	3	0.048
1567498500	5	0.027
1567498500	6	0.003
1567498500	9	0.026
1567499400	2	0.019
1567499400	3	0.048
1567499400	5	0.027
1567499400	6	0.002
1567499400	9	0.002
1567500300	2	0.005
1567500300	3	0.048
1567500300	5	0.027
1567500300	6	0.002
1567500300	9	0.057
1567501200	2	0.019
1567501200	3	0.047
1567501200	5	0.049
1567501200	6	0.003
1567501200	9	0.012
1567502100	2	0.017
1567502100	3	0.047
1567502100	5	0.036
1567502100	6	0.003
1567502100	9	0.019
1567503000	2	0.007
1567503000	3	0.047
1567503000	5	0.027
1567503000	6	0.002
1567503000	9	0.008
1567503900	2	0.019
1567503900	3	0.047
1567503900	5	0.026
1567503900	6	0.002
1567503900	9	0.002
1567504800	2	0.015
1567504800	3	0.021
1567504800	5	0.027
1567504800	6	0.003
1567504800	9	0.026
1567505700	2	0.009
1567505700	3	0.0
1567505700	5	0.027
1567505700	6	0.003
1567505700	9	0.007
1567506600	2	0.019
1567506600	3	0.0
1567506600	5	0.026
1567506600	6	0.011
1567506600	9	0.062
1567507500	2	0.012
1567507500	3	0.0
1567507500	5	0.038
1567507500	6	0.006
1567507500	9	0.002
1567508400	2	0.012
1567508400	3	0.0
1567508400	5	0.046
1567508400	6	0.005
1567508400	9	0.017
1567509300	2	0.107
1567509300	3	0.0
1567509300	5	0.027
1567509300	6	0.008
1567509300	9	0.011
1567510200	2	0.246
1567510200	3	0.0
1567510200	5	0.025
1567510200	6	0.048
1567510200	9	0.001
1567511100	2	0.194
1567511100	3	0.0
1567511100	5	0.022
1567511100	6	0.045
1567511100	9	0.027
1567512000	2	0.214
1567512000	3	0.0
1567512000	5	0.022
1567512000	6	0.047
1567512000	9	0.025
1567512900	2	0.227
1567512900	3	0.0
1567512900	5	0.022
1567512900	6	0.035
1567512900	9	0.044
1567513800	2	0.227
1567513800	3	0.0
1567513800	5	0.039
1567513800	6	0.031
1567513800	9	0.002
1567514700	2	0.211
1567514700	3	0.0
1567514700	5	0.049
1567514700	6	0.009
1567514700	9	0.013
1567515600	2	0.223
1567515600	3	0.0
1567515600	5	0.029
1567515600	6	0.156
1567515600	9	0.015
1567516500	2	0.211
1567516500	3	0.0
1567516500	5	0.022
1567516500	6	0.079
1567516500	9	0.001
1567517400	2	0.201
1567517400	3	0.0
1567517400	5	0.021
1567517400	6	0.05
1567517400	9	0.026
1567518300	2	0.01
1567518300	3	0.0
1567518300	5	0.022
1567518300	6	0.034
1567518300	9	0.04
1567519200	2	0.018
1567519200	3	0.0
1567519200	5	0.022
1567519200	6	0.017
1567519200	9	0.028
1567520100	2	0.02
1567520100	3	0.0
1567520100	5	0.021
1567520100	6	0.059
1567520100	9	0.004
1567521000	2	0.013
1567521000	3	0.0
1567521000	5	0.041
1567521000	6	0.048
1567521000	9	0.009
1567521900	2	0.012
1567521900	3	0.0
1567521900	5	0.038
1567521900	6	0.004
1567521900	9	0.018
1567522800	2	0.018
1567522800	3	0.0
1567522800	5	0.023
1567522800	6	0.005
1567522800	9	0.002
1567523700	2	0.017
1567523700	3	0.0
1567523700	5	0.024
1567523700	6	0.005
1567523700	9	0.045
1567524600	2	0.008
1567524600	3	0.0
1567524600	5	0.022
1567524600	6	0.005
1567524600	9	0.025
1567525500	2	0.018
1567525500	3	0.0
1567525500	5	0.022
1567525500	6	0.005
1567525500	9	0.027
1567526400	2	0.042
1567526400	3	0.0
1567526400	5	0.022
1567526400	6	0.005
1567526400	9	0.001
1567527300	2	0.035
1567527300	3	0.0
1567527300	5	0.045
1567527300	6	0.005
1567527300	9	0.019
1567528200	2	0.047
1567528200	3	0.0
1567528200	5	0.031
1567528200	6	0.003
1567528200	9	0.009
1567529100	2	0.047
1567529100	3	0.0
1567529100	5	0.023
1567529100	6	0.003
1567529100	9	0.006
1567530000	2	0.035
1567530000	3	0.0
1567530000	5	0.022
1567530000	6	0.009
1567530000	9	0.063
1567530900	2	0.046
1567530900	3	0.0
1567530900	5	0.021
1567530900	6	0.005
1567530900	9	0.002
1567531800	2	0.033
1567531800	3	0.0
1567531800	5	0.022
1567531800	6	0.005
1567531800	9	0.028
1567532700	2	0.021
1567532700	3	0.0
1567532700	5	0.034
1567532700	6	0.005
1567532700	9	0.002
1567533600	2	0.028
1567533600	3	0.0
1567533600	5	0.042
1567533600	6	0.003
1567533600	9	0.026
1567534500	2	0.031
1567534500	3	0.0
1567534500	5	0.022
1567534500	6	0.004
1567534500	9	0.001
1567535400	2	0.023
1567535400	3	0.0
1567535400	5	0.022
1567535400	6	0.006
1567535400	9	0.06
1567536300	2	0.026
1567536300	3	0.0
1567536300	5	0.022
1567536300	6	0.012
1567536300	9	0.009
1567537200	2	0.031
1567537200	3	0.0
1567537200	5	0.021
1567537200	6	0.032
1567537200	9	0.018
1567538100	2	0.016
1567538100	3	0.0
1567538100	5	0.023
1567538100	6	0.025
1567538100	9	0.009
1567539000	2	0.013
1567539000	3	0.0
1567539000	5	0.044
1567539000	6	0.016
1567539000	9	0.018
1567539900	2	0.021
1567539900	3	0.0
1567539900	5	0.031
1567539900	6	0.011
1567539900	9	0.01
1567540800	2	0.017
1567540800	3	0.0
1567540800	5	0.021
1567540800	6	0.014
1567540800	9	0.047
1567541700	2	0.012
1567541700	3	0.0
1567541700	5	0.021
1567541700	6	0.026
1567541700	9	0.023
1567542600	2	0.04
1567542600	3	0.0
1567542600	5	0.022
1567542600	6	0.004
1567542600	9	0.007
1567543500	2	0.046
1567543500	3	0.0
1567543500	5	0.026
1567543500	6	0.01
1567543500	9	0.021
1567544400	2	0.035
1567544400	3	0.0
1567544400	5	0.038
1567544400	6	0.05
1567544400	9	0.004
1567545300	2	0.047
1567545300	3	0.0
1567545300	5	0.042
1567545300	6	0.055
1567545300	9	0.024
1567546200	2	0.049
1567546200	3	0.0
1567546200	5	0.023
1567546200	6	0.052
1567546200	9	0.032
1567547100	2	0.035
1567547100	3	0.013
1567547100	5	0.025
1567547100	6	0.052
1567547100	9	0.045
1567548000	2	0.048
1567548000	3	0.049
1567548000	5	0.026
1567548000	6	0.052
1567548000	9	0.029
1567548900	2	0.05
1567548900	3	0.048
1567548900	5	0.036
1567548900	6	0.035
1567548900	9	0.01
1567549800	2	0.148
1567549800	3	0.048
1567549800	5	0.028
1567549800	6	0.019
1567549800	9	0.022
1567550700	2	0.248
1567550700	3	0.048
1567550700	5	0.045
1567550700	6	0.024
1567550700	9	0.03
1567551600	2	0.257
1567551600	3	0.046
1567551600	5	0.035
1567551600	6	0.051
1567551600	9	0.043
1567552500	2	0.26
1567552500	3	0.046
1567552500	5	0.028
1567552500	6	0.054
1567552500	9	0.028
1567553400	2	0.252
1567553400	3	0.047
1567553400	5	0.03
1567553400	6	0.018
1567553400	9	0.03
1567554300	2	0.26
1567554300	3	0.046
1567554300	5	0.026
1567554300	6	0.01
1567554300	9	0.024
1567555200	2	0.262
1567555200	3	0.045
1567555200	5	0.026
1567555200	6	0.011
1567555200	9	0.007
1567556100	2	0.201
1567556100	3	0.047
1567556100	5	0.027
1567556100	6	0.011
1567556100	9	0.028
1567557000	2	0.024
1567557000	3	0.047
1567557000	5	0.05
1567557000	6	0.012
1567557000	9	0.054
1567557900	2	0.028
1567557900	3	0.047
1567557900	5	0.033
1567557900	6	0.011
1567557900	9	0.023
1567558800	2	0.022
1567558800	3	0.048
1567558800	5	0.027
1567558800	6	0.011
1567558800	9	0.024
1567559700	2	0.022
1567559700	3	0.046
1567559700	5	0.027
1567559700	6	0.011
1567559700	9	0.03
1567560600	2	0.028
1567560600	3	0.048
1567560600	5	0.026
1567560600	6	0.01
1567560600	9	0.005
1567561500	2	0.025
1567561500	3	0.047
1567561500	5	0.027
1567561500	6	0.003
1567561500	9	0.027
1567562400	2	0.023
1567562400	3	0.047
1567562400	5	0.027
1567562400	6	0.002
1567562400	9	0.038
1567563300	2	0.028
1567563300	3	0.048
1567563300	5	0.05
1567563300	6	0.002
1567563300	9	0.035
1567564200	2	0.025
1567564200	3	0.047
1567564200	5	0.036
1567564200	6	0.003
1567564200	9	0.031
1567565100	2	0.02
1567565100	3	0.047
1567565100	5	0.027
1567565100	6	0.002
1567565100	9	0.02
1567566000	2	0.028
1567566000	3	0.047
1567566000	5	0.027
1567566000	6	0.006
1567566000	9	0.011
1567566900	2	0.022
1567566900	3	0.048
1567566900	5	0.027
1567566900	6	0.003
1567566900	9	0.03
1567567800	2	0.01
1567567800	3	0.048
1567567800	5	0.027
1567567800	6	0.002
1567567800	9	0.01
1567568700	2	0.018
1567568700	3	0.048
1567568700	5	0.027
1567568700	6	0.002
1567568700	9	0.055
1567569600	2	0.015
1567569600	3	0.048
1567569600	5	0.045
1567569600	6	0.003
1567569600	9	0.035
1567570500	2	0.01
1567570500	3	0.049
1567570500	5	0.04
1567570500	6	0.002
1567570500	9	0.003
1567571400	2	0.019
1567571400	3	0.047
1567571400	5	0.027
1567571400	6	0.003
1567571400	9	0.03
1567572300	2	0.014
1567572300	3	0.047
1567572300	5	0.027
1567572300	6	0.002
1567572300	9	0.015
1567573200	2	0.012
1567573200	3	0.047
1567573200	5	0.028
1567573200	6	0.002
1567573200	9	0.017
1567574100	2	0.018
1567574100	3	0.048
1567574100	5	0.027
1567574100	6	0.004
1567574100	9	0.031
1567575000	2	0.01
1567575000	3	0.047
1567575000	5	0.028
1567575000	6	0.002
1567575000	9	0.042
1567575900	2	0.015
1567575900	3	0.048
1567575900	5	0.036
1567575900	6	0.003
1567575900	9	0.03
1567576800	2	0.019
1567576800	3	0.047
1567576800	5	0.048
1567576800	6	0.002
1567576800	9	0.006
1567577700	2	0.007
1567577700	3	0.047
1567577700	5	0.027
1567577700	6	0.003
1567577700	9	0.025
1567578600	2	0.017
1567578600	3	0.049
1567578600	5	0.027
1567578600	6	0.002
1567578600	9	0.018
1567579500	2	0.018
1567579500	3	0.05
1567579500	5	0.027
1567579500	6	0.003
1567579500	9	0.014
1567580400	2	0.006
1567580400	3	0.049
1567580400	5	0.027
1567580400	6	0.002
1567580400	9	0.036
1567581300	2	0.019
1567581300	3	0.049
1567581300	5	0.027
1567581300	6	0.002
1567581300	9	0.037
1567582200	2	0.018
1567582200	3	0.049
1567582200	5	0.028
1567582200	6	0.003
1567582200	9	0.031
1567583100	2	0.006
1567583100	3	0.048
1567583100	5	0.047
1567583100	6	0.002
1567583100	9	0.001
1567584000	2	0.018
1567584000	3	0.048
1567584000	5	0.036
1567584000	6	0.003
1567584000	9	0.03
1567584900	2	0.019
1567584900	3	0.048
1567584900	5	0.027
1567584900	6	0.002
1567584900	9	0.003
1567585800	2	0.006
1567585800	3	0.049
1567585800	5	0.028
1567585800	6	0.002
1567585800	9	0.029
1567586700	2	0.018
1567586700	3	0.048
1567586700	5	0.027
1567586700	6	0.003
1567586700	9	0.016
1567587600	2	0.016
1567587600	3	0.048
1567587600	5	0.027
1567587600	6	0.002
1567587600	9	0.059
1567588500	2	0.008
1567588500	3	0.047
1567588500	5	0.027
1567588500	6	0.003
1567588500	9	0.011
1567589400	2	0.018
1567589400	3	0.049
1567589400	5	0.032
1567589400	6	0.002
1567589400	9	0.02
1567590300	2	0.013
1567590300	3	0.048
1567590300	5	0.048
1567590300	6	0.003
1567590300	9	0.017
1567591200	2	0.012
1567591200	3	0.015
1567591200	5	0.028
1567591200	6	0.004
1567591200	9	0.016
1567592100	2	0.018
1567592100	3	0.0
1567592100	5	0.027
1567592100	6	0.004
1567592100	9	0.016
1567593000	2	0.008
1567593000	3	0.0
1567593000	5	0.027
1567593000	6	0.003
1567593000	9	0.012
1567593900	2	0.016
1567593900	3	0.0
1567593900	5	0.022
1567593900	6	0.004
1567593900	9	0.05
1567594800	2	0.126
1567594800	3	0.0
1567594800	5	0.022
1567594800	6	0.003
1567594800	9	0.024
1567595700	2	0.272
1567595700	3	0.0
1567595700	5	0.021
1567595700	6	0.005
1567595700	9	0.018
1567596600	2	0.203
1567596600	3	0.0
1567596600	5	0.038
1567596600	6	0.006
1567596600	9	0.013
1567597500	2	0.203
1567597500	3	0.0
1567597500	5	0.051
1567597500	6	0.007
1567597500	9	0.018
1567598400	2	0.194
1567598400	3	0.0
1567598400	5	0.03
1567598400	6	0.006
1567598400	9	0.015
1567599300	2	0.205
1567599300	3	0.0
1567599300	5	0.022
1567599300	6	0.005
1567599300	9	0.019
1567600200	2	0.201
1567600200	3	0.0
1567600200	5	0.025
1567600200	6	0.005
1567600200	9	0.021
1567601100	2	0.128
1567601100	3	0.0
1567601100	5	0.022
1567601100	6	0.006
1567601100	9	0.054
1567602000	2	0.02
1567602000	3	0.0
1567602000	5	0.022
1567602000	6	0.005
1567602000	9	0.012
1567602900	2	0.012
1567602900	3	0.0
1567602900	5	0.027
1567602900	6	0.006
1567602900	9	0.024
1567603800	2	0.013
1567603800	3	0.0
1567603800	5	0.043
1567603800	6	0.006
1567603800	9	0.008
1567604700	2	0.019
1567604700	3	0.0
1567604700	5	0.026
1567604700	6	0.005
1567604700	9	0.027
1567605600	2	0.009
1567605600	3	0.0
1567605600	5	0.024
1567605600	6	0.043
1567605600	9	0.005
1567606500	2	0.016
1567606500	3	0.0
1567606500	5	0.024
1567606500	6	0.054
1567606500	9	0.03
1567607400	2	0.02
1567607400	3	0.0
1567607400	5	0.022
1567607400	6	0.046
1567607400	9	0.039
1567608300	2	0.022
1567608300	3	0.0
1567608300	5	0.022
1567608300	6	0.011
1567608300	9	0.036
1567609200	2	0.042
1567609200	3	0.0
1567609200	5	0.028
1567609200	6	0.003
1567609200	9	0.003
1567610100	2	0.046
1567610100	3	0.0
1567610100	5	0.047
1567610100	6	0.003
1567610100	9	0.029
1567611000	2	0.036
1567611000	3	0.0
1567611000	5	0.027
1567611000	6	0.002
1567611000	9	0.016
1567611900	2	0.042
1567611900	3	0.0
1567611900	5	0.022
1567611900	6	0.003
1567611900	9	0.016
1567612800	2	0.046
1567612800	3	0.0
1567612800	5	0.028
1567612800	6	0.002
1567612800	9	0.029
1567613700	2	0.036
1567613700	3	0.0
1567613700	5	0.046
1567613700	6	0.002
1567613700	9	0.032
1567614600	2	0.043
1567614600	3	0.0
1567614600	5	0.054
1567614600	6	0.003
1567614600	9	0.046
1567615500	2	0.055
1567615500	3	0.0
1567615500	5	0.047
1567615500	6	0.002
1567615500	9	0.005
1567616400	2	0.067
1567616400	3	0.0
1567616400	5	0.062
1567616400	6	0.002
1567616400	9	0.028
1567617300	2	0.052
1567617300	3	0.0
1567617300	5	0.04
1567617300	6	0.003
1567617300	9	0.019
1567618200	2	0.069
1567618200	3	0.0
1567618200	5	0.039
1567618200	6	0.002
1567618200	9	0.014
1567619100	2	0.066
1567619100	3	0.0
1567619100	5	0.038
1567619100	6	0.003
1567619100	9	0.032
1567620000	2	0.028
1567620000	3	0.0
1567620000	5	0.78
1567620000	6	0.002
1567620000	9	0.039
1567620900	2	0.119
1567620900	3	0.0
1567620900	5	0.095
1567620900	6	0.003
1567620900	9	0.036
1567621800	2	0.069
1567621800	3	0.0
1567621800	5	0.032
1567621800	6	0.002
1567621800	9	0.02
1567622700	2	0.08
1567622700	3	0.0
1567622700	5	0.043
1567622700	6	0.002
1567622700	9	0.014
1567623600	2	0.014
1567623600	3	0.0
1567623600	5	0.021
1567623600	6	0.003
1567623600	9	0.033
1567624500	2	0.022
1567624500	3	0.0
1567624500	5	0.022
1567624500	6	0.002
1567624500	9	0.005
1567625400	2	0.035
1567625400	3	0.0
1567625400	5	0.021
1567625400	6	0.003
1567625400	9	0.04
1567626300	2	0.039
1567626300	3	0.0
1567626300	5	0.022
1567626300	6	0.002
1567626300	9	0.053
1567627200	2	0.036
1567627200	3	0.0
1567627200	5	0.022
1567627200	6	0.002
1567627200	9	0.012
1567628100	2	0.019
1567628100	3	0.0
1567628100	5	0.035
1567628100	6	0.003
1567628100	9	0.027
1567629000	2	0.008
1567629000	3	0.0
1567629000	5	0.04
1567629000	6	0.002
1567629000	9	0.002
1567629900	2	0.038
1567629900	3	0.0
1567629900	5	0.024
1567629900	6	0.036
1567629900	9	0.026
1567630800	2	0.097
1567630800	3	0.0
1567630800	5	0.022
1567630800	6	0.043
1567630800	9	0.002
1567631700	2	0.035
1567631700	3	0.0
1567631700	5	0.021
1567631700	6	0.035
1567631700	9	0.058
1567632600	2	0.044
1567632600	3	0.0
1567632600	5	0.022
1567632600	6	0.002
1567632600	9	0.012
1567633500	2	0.046
1567633500	3	0.037
1567633500	5	0.026
1567633500	6	0.005
1567633500	9	0.002
1567634400	2	0.039
1567634400	3	0.05
1567634400	5	0.036
1567634400	6	0.006
1567634400	9	0.026
1567635300	2	0.045
1567635300	3	0.05
1567635300	5	0.044
1567635300	6	0.054
1567635300	9	0.002
1567636200	2	0.126
1567636200	3	0.049
1567636200	5	0.024
1567636200	6	0.048
1567636200	9	0.025
1567637100	2	0.234
1567637100	3	0.046
1567637100	5	0.026
1567637100	6	0.045
1567637100	9	0.027
1567638000	2	0.244
1567638000	3	0.049
1567638000	5	0.024
1567638000	6	0.046
1567638000	9	0.018
1567638900	2	0.259
1567638900	3	0.048
1567638900	5	0.024
1567638900	6	0.04
1567638900	9	0.027
1567639800	2	0.263
1567639800	3	0.048
1567639800	5	0.024
1567639800	6	0.037
1567639800	9	0.002
1567640700	2	0.253
1567640700	3	0.05
1567640700	5	0.035
1567640700	6	0.028
1567640700	9	0.026
1567641600	2	0.265
1567641600	3	0.049
1567641600	5	0.051
1567641600	6	0.028
1567641600	9	0.003
1567642500	2	0.264
1567642500	3	0.049
1567642500	5	0.042
1567642500	6	0.018
1567642500	9	0.007
1567643400	2	0.254
1567643400	3	0.049
1567643400	5	0.041
1567643400	6	0.003
1567643400	9	0.063
1567644300	2	0.07
1567644300	3	0.048
1567644300	5	0.043
1567644300	6	0.044
1567644300	9	0.001
1567645200	2	0.028
1567645200	3	0.05
1567645200	5	0.042
1567645200	6	0.043
1567645200	9	0.021
1567646100	2	0.017
1567646100	3	0.049
1567646100	5	0.046
1567646100	6	0.041
1567646100	9	0.008
1567647000	2	0.026
1567647000	3	0.05
1567647000	5	0.045
1567647000	6	0.039
1567647000	9	0.002
1567647900	2	0.028
1567647900	3	0.049
1567647900	5	0.054
1567647900	6	0.038
1567647900	9	0.027
1567648800	2	0.018
1567648800	3	0.05
1567648800	5	0.038
1567648800	6	0.005
1567648800	9	0.024
1567649700	2	0.026
1567649700	3	0.05
1567649700	5	0.027
1567649700	6	0.002
1567649700	9	0.026
1567650600	2	0.028
1567650600	3	0.05
1567650600	5	0.027
1567650600	6	0.031
1567650600	9	0.02
1567651500	2	0.019
1567651500	3	0.05
1567651500	5	0.028
1567651500	6	0.032
1567651500	9	0.002
1567652400	2	0.025
1567652400	3	0.049
1567652400	5	0.027
1567652400	6	0.003
1567652400	9	0.023
1567653300	2	0.023
1567653300	3	0.05
1567653300	5	0.027
1567653300	6	0.002
1567653300	9	0.006
1567654200	2	0.009
1567654200	3	0.051
1567654200	5	0.034
1567654200	6	0.003
1567654200	9	0.002
1567655100	2	0.015
1567655100	3	0.05
1567655100	5	0.048
1567655100	6	0.002
1567655100	9	0.057
1567656000	2	0.018
1567656000	3	0.05
1567656000	5	0.023
1567656000	6	0.002
1567656000	9	0.012
1567656900	2	0.009
1567656900	3	0.051
1567656900	5	0.022
1567656900	6	0.003
1567656900	9	0.001
1567657800	2	0.016
1567657800	3	0.05
1567657800	5	0.022
1567657800	6	0.002
1567657800	9	0.028
1567658700	2	0.018
1567658700	3	0.051
1567658700	5	0.022
1567658700	6	0.005
1567658700	9	0.002
1567659600	2	0.008
1567659600	3	0.05
1567659600	5	0.023
1567659600	6	0.002
1567659600	9	0.008
1567660500	2	0.016
1567660500	3	0.051
1567660500	5	0.022
1567660500	6	0.003
1567660500	9	0.021
1567661400	2	0.019
1567661400	3	0.051
1567661400	5	0.036
1567661400	6	0.002
1567661400	9	0.035
1567662300	2	0.006
1567662300	3	0.051
1567662300	5	0.038
1567662300	6	0.002
1567662300	9	0.021
1567663200	2	0.018
1567663200	3	0.051
1567663200	5	0.021
1567663200	6	0.003
1567663200	9	0.017
1567664100	2	0.018
1567664100	3	0.051
1567664100	5	0.022
1567664100	6	0.002
1567664100	9	0.002
1567665000	2	0.078
1567665000	3	0.051
1567665000	5	0.022
1567665000	6	0.002
1567665000	9	0.019
1567665900	2	0.207
1567665900	3	0.05
1567665900	5	0.021
1567665900	6	0.003
[truncated: 8,000 more rows]
